# Supplementary material for: Utilizing Interactive Surfaces to Enhance Learning, Collaboration and Engagement: Insights from Learners’ Gaze and Speech
Source: MDPI journal article supplement (doi:10.3390/s20071964), 2020-03-31
Supplement: s1 [file s1]

## Supplementary Material

Article

# Utilizing Interactive Surfaces to Enhance Learning, Collaboration and Engagement: Insights from Learners' Gaze and Speech

Kshitij Sharma \*, Ioannis Leftheriotis and Michail Giannakos

Department of Computer Science, Norwegian University of Science and Technology, Trondheim 7491, Norway; midmandy@gmail.com (I.L.); michailg@ntnu.no (M.G.)

\* Correspondence: kshitij.sharma@ntnu.no

## Pre-test

A. Gender:

B. Age:

C. Previous experience with technology

|            |   |   |   |   |   |           |
|------------|---|---|---|---|---|-----------|
| 1          | 2 | 3 | 4 | 5 | 6 | 7         |
| Not at all |   |   |   |   |   | Very Much |

D. Previous experience with touch screens (e.g., big screens, ipads, mobile devices)

|            |   |   |   |   |   |           |
|------------|---|---|---|---|---|-----------|
| 1          | 2 | 3 | 4 | 5 | 6 | 7         |
| Not at all |   |   |   |   |   | Very Much |

E. Previous experience with big touch screens (bigger than a laptop size)

|            |   |   |   |   |   |           |
|------------|---|---|---|---|---|-----------|
| 1          | 2 | 3 | 4 | 5 | 6 | 7         |
| Not at all |   |   |   |   |   | Very Much |

1. Which image shows the correct placement of the parietal and temporal lobes?

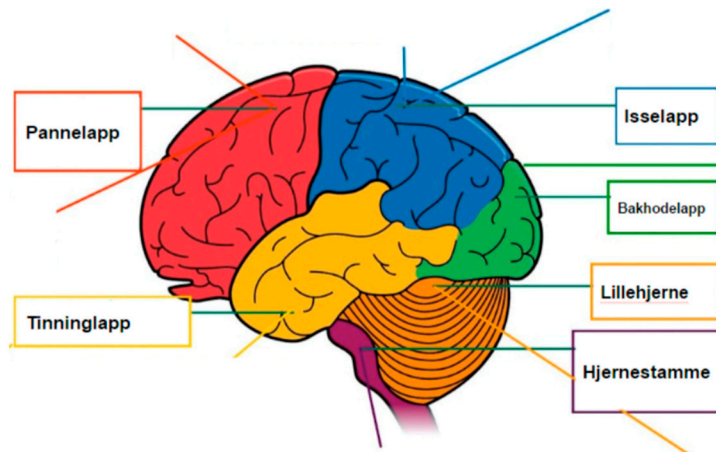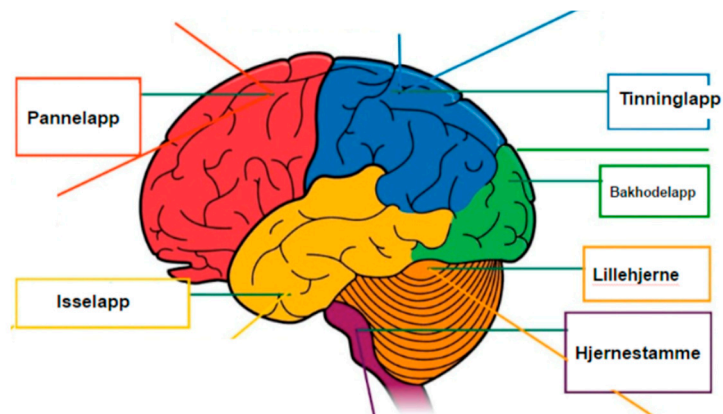

2. More boys than girls have dyslexia

**False, longitudinal research shows as many girls are affected as boys**

**True, this is linked with boys neurologically maturing later**

3. Dyslexia affects \_\_\_ % of the population and often occurs with \_\_\_\_

4. Which part of the brain is most closely associated with ADHD?

**left-sided prefrontal cortex**

**right-sided prefrontal cortex**

5. What is the cause of ADHD?

**In a majority of cases, this is unfortunately unknown<sup>[1][2][3][4][5][6][7][8][9][10]</sup>**

**The vast majority of cases have a causal link to population density**

6. Which image shows the part of the brain affected by temporal lobe epilepsy?

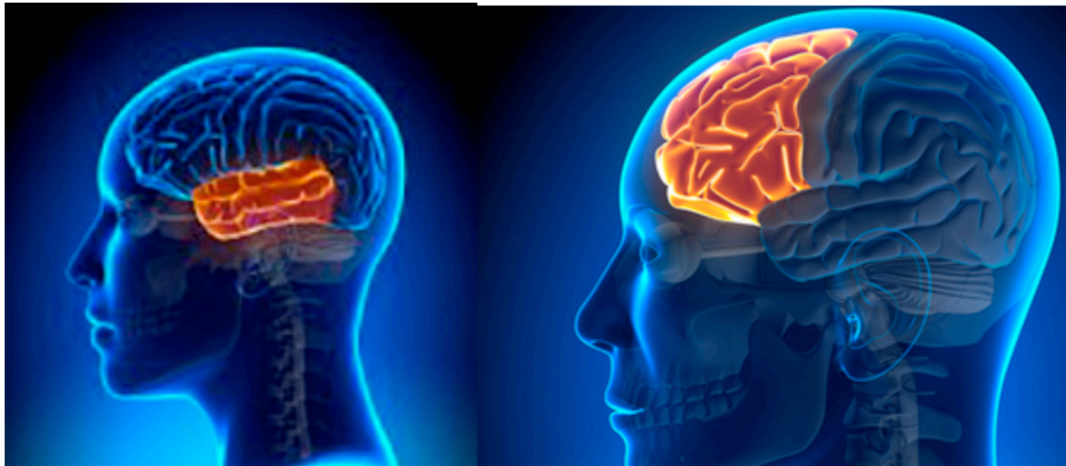

7. What is the amygdala responsible for?

**Decision making**

**Long-term memory**

8. What the thalamus responsible for?

**Short term memory**

**Sleep**

9. Which image shows the thalamus?

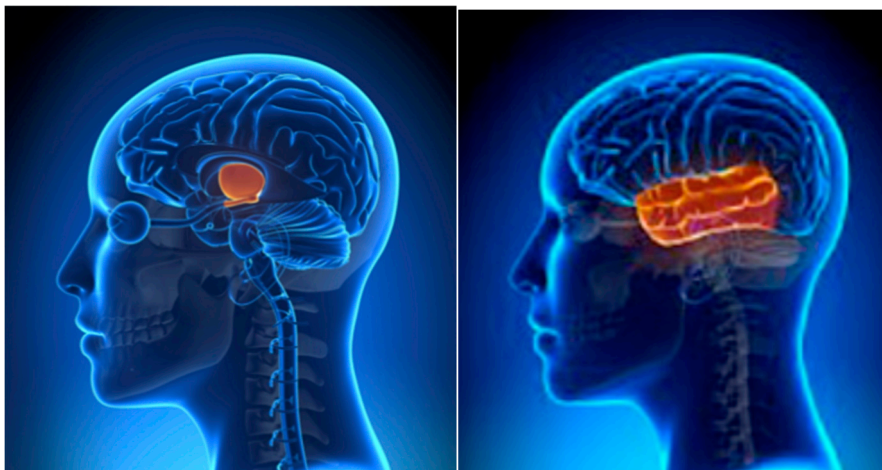

10. Which part of the brain is responsible for language and attention?

**Cerebellum**

**Hippocampus**

# First post-test

1. Which gland produces insulin?

**Pancreas**

**Pituitary**

2. What are the common symptoms of dyslexia?

**Trouble reading**

**Insomnia**

3. Which brain functions are affected by ADHD?

**The left-sided prefrontal cortex.**

**The right-sided prefrontal cortex.**

4. Which image shows the part of the brain associated with ADHD?

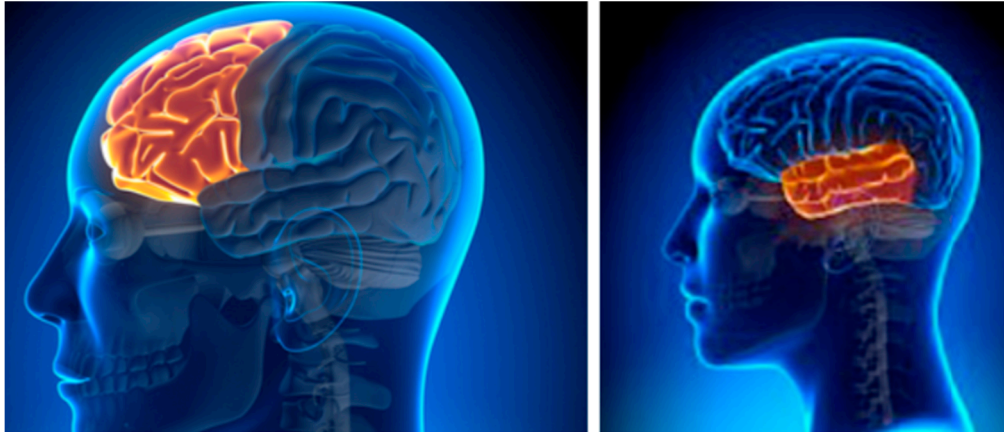

5. What is the most common cause of temporal lobe epilepsy?

**Traumatic brain injury**

**Headache**

6. What treatments are effective for sufferers of temporal lobe epilepsy?

**Antiepileptic drugs and surgical interventions**

**No treatment**

7. Which region of the brain stores long term memory?

**Hippocampus** <sup>[L]</sup><sub>[SEP]</sub>

**Thalamus** <sup>[L]</sup><sub>[SEP]</sub>

8. What is the function of the hypothalamus

**Body temperature** <sup>[L]</sup><sub>[SEP]</sub>

**Emotions** <sup>[L]</sup><sub>[SEP]</sub>

9. Which part of the brain controls body temperature?

**Hypothalamus** <sup>[L]</sup><sub>[SEP]</sub>

**Amygdala** <sup>[L]</sup><sub>[SEP]</sub>

10. The cerebellum is responsible for \_\_\_\_

**Language and attention** <sup>[L]</sup><sub>[SEP]</sub>

**Short time memory** <sup>[L]</sup><sub>[SEP]</sub>

## Second post-test

1. What is the name of the hormone the testes produce?

**Testosterone**

**Insuline**

2. Which image shows the part of the brain associated with dyslexia?

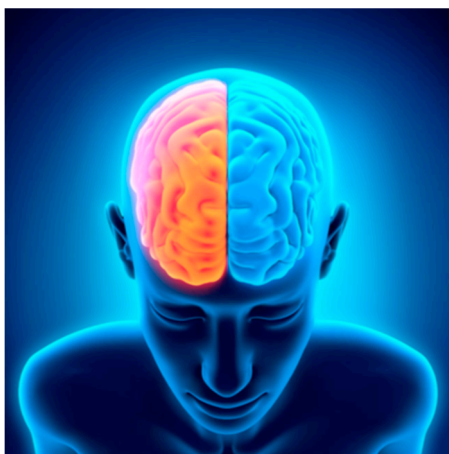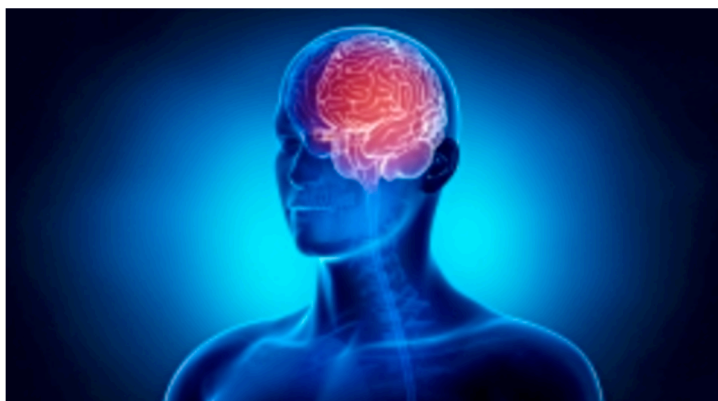

3. What is the most common symptom of ADHD?

**Problems paying attention**

**Abnormal aging**

4. The temporal lobe is associated with temporal lobe epilepsy, which image points to the temporal lobe?

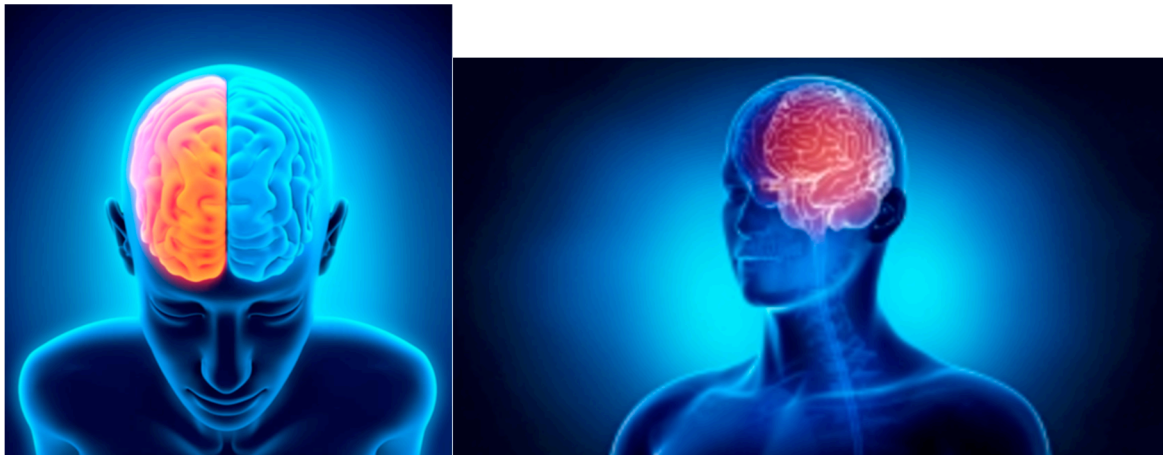

5. What is the most common symptom of temporal lobe epilepsy?

**Lack of attention**

**Simple partial seizures**

6. Which part of the brain is responsible for long-term memory?

**Hypothalamus**

**Hippocampus**

7. Which part of the brain regulates body temperature and hunger control?

**Hypothalamus**

**Hippocampus**

8. What is the function of the cerebellum?

**Language and attention**

### **Sleep and sensory interpretation**

9. What is the function of the thalamus?

### **Language and attention**

### **Sleep and sensory interpretation**

10. What is the most common name for neurons?

### **Nerve Cells**

### **Brain Cells**
